# Supplementary material
Source: PubMed Central journal article supplement (PMC4044859)
Supplement: supp_pp.114.239665_239665Word_supplemental_Information_Breitenbachrevised.pdf [file supp_pp.114.239665_239665Word_supplemental_Information_Breitenbachrevised.pdf]

| Gene             | Primer Name                            | Primer Sequence                                                                           |
|------------------|----------------------------------------|-------------------------------------------------------------------------------------------|
| <i>At5g10760</i> | pRNAi-1-5'cl<br>pRNAi-1-3'cl           | CACCCTCGAGTCTAGAGCTAAAAGTGGAATCACACT<br>C<br>CGGAGGAAGGGAGGCAGTAAGACGAGAAGCCCAGC<br>AACAC |
| <i>At5g10770</i> | pRNAi-70-<br>5'cl<br>pRNAi-70-<br>3'cl | GTGTTGCTGGGCTTCTCGTCTTACTGCCTCCCTTCT<br>CCG<br>CGAATTCAAGCTTCGAACCAAGCTCCACGACG           |
| <i>AED1</i>      | pAED1-5'cl<br>pAED1-3'cl               | CACCGAGAGTAAGAGGGAGGTT<br>ACAACCATTGGGAGCAAAAC                                            |
| <i>AED1</i>      | pAED1-5'q<br>pAED1-5'q                 | ATTATGCTTTGCGTATGTCTCAATTGG<br>GGACTCCACACGTGCTTGATCG                                     |
| <i>At5g10770</i> | p10770-5'q<br>p10770-3'q               | CGATGGAGCTCAAGAAAGAGAGACTGA<br>GCGAGCCTGGTCGAGTCTTAGGA                                    |
| <i>AED4</i>      | pAED4-5'q<br>pAED4-3'q                 | TCGACGTTCTCACTGAGCTACTTGGA<br>CCACCACTTGTGCCACTGTGTTC                                     |
| <i>LLP1</i>      | pLLP1-5'q<br>pLLP1-3'q                 | TGAGTAAACAGCAGTTACGA<br>TGACGCCATCAGAAGCAGGA                                              |
| <i>PNP-A</i>     | pPNP-5'q<br>pPNP-3'q                   | AGCTGCTCAAGGAAAAGCTG<br>AATGCATCGAACCCCTGTACC                                             |
| <i>PR1</i>       | pPR1-5'q<br>pPR1-3'q                   | CTACGCAGAACAATAAGAGGCAAC<br>TTGGCACATCCGAGTCTCACTG                                        |
| <i>PR5</i>       | pPR5-5'q<br>pPR5-3'q                   | ATCGGGAGATTGCAAATACG<br>GCGTAGCTATAGGCGTCAGG                                              |
| <i>AvrRpm1</i>   | pAVR-5'q<br>pAVR-3'q                   | CGAACTCAGCCCCTACAGAC<br>GTCGTTCTGCAGCTGAATTG                                              |
| <i>TUBULIN</i>   | pTUB-5'q<br>pTUB-3'q                   | GTACCTTGAAGCTTGCTAATCCTA<br>GTCAAAGGTGCAAAACCAAC                                          |
| <i>UBIQUITIN</i> | pUBI-5'q<br>pUBI-3'q                   | AGATCCAGGACAAGGTATTC<br>CGCAGGACCAAGTGAAGAGTAG                                            |

**Supplemental Table S2** Primers used in this study. Primers with names ending with 'cl' were used to amplify cDNA for cloning. Primers with names ending with 'q' were used for qPCR.

## Supplemental Protocol S1 – MALDI-MS parameters for protein identification in 2D gel spots

Data collection:

PMF –

Number of shots: 1200

Mass Range: 900 – 5000 m/z

MS/MS

Parent Ion Isolation Assessment –

Automatic Precursor intensity optimization – 100 shots – Peak width < 0.8 m/z

Number of shots: 300 satisfactory spectra at final laser intensity

Fragmentation:

Relative Laser Intensity Boost: 45%

Precursor Ion Suppression

Number of shots: 800

Mass range: Precursor-dependent

Baseline subtraction: Tophat

Smoothing:

PMF:Chemical Noise 0.15 m/z

MS/MS:Savistky/Golay 0.15m/z 4 cycles

Peak picking

Algorithm: SNAP

PMF: 200 peaks, sig/noise>4

MS/MS: 200 peaks, sig/noise>3

Centroid width 0.2m/z, height 90%

Mascot searching:

Number of tryptic miscleavages allowed: 1

Peptide tolerance for PMF 50 ppm 150 ppm (without post calibration)

Peptide Mass Tolerance for MS/MS precursor 0.4 Da fragments 0.4 Da

Fixed mods – Carbamidomethyl Cystein

Variable modes – Methionine Oxidation
